# Supplementary material
Source: MDPI journal article supplement (https://www.mdpi.com/2624-862X/2/3/37)
Supplement: s1 [file s1]

## Supplementary material:

Table S1: Amino acids analysis of pellet and forage (Period 1).

|                               |               | Pellet  |       | Forage       |         |
|-------------------------------|---------------|---------|-------|--------------|---------|
|                               |               | Control | Trial | Wheat silage | Pasture |
| DM%                           |               | 86.9    | 87.3  | 61.6         | 92.3    |
| Crude protein % (DM basis)    |               | 16.8    | 15.1  | 11.9         | 22.3    |
| % (DM basis)                  | Threonine     | 0.41    | 0.39  | 0.51         | 0.91    |
|                               | Serine        | 0.58    | 0.56  | 0.49         | 0.83    |
|                               | Glutamic acid | 3.30    | 3.21  | 1.12         | 2.23    |
|                               | Glycine       | 0.56    | 0.56  | 0.59         | 1.09    |
|                               | Alanine       | 0.47    | 0.46  | 0.87         | 1.29    |
|                               | Aspartic acid | 0.72    | 0.70  | 1.19         | 1.80    |
|                               | Valine        | 0.59    | 0.56  | 0.81         | 1.16    |
|                               | Methionine    | 0.16    | 0.30  | 0.08         | 0.18    |
|                               | Lysine        | 0.44    | 0.48  | 0.52         | 1.08    |
|                               | Isoleucine    | 0.45    | 0.44  | 0.63         | 0.92    |
|                               | Leucine       | 0.86    | 0.82  | 0.99         | 1.68    |
|                               | Arginine      | 0.61    | 0.61  | 0.43         | 1.01    |
|                               | Proline       | 1.19    | 1.12  | 1.77         | 0.94    |
| % of crude protein (DM basis) | Threonine     | 2.47    | 2.58  | 4.26         | 4.09    |
|                               | Serine        | 3.42    | 3.72  | 4.13         | 3.74    |
|                               | Glutamic acid | 19.7    | 21.2  | 9.39         | 9.99    |
|                               | Glycine       | 3.36    | 3.72  | 4.98         | 4.87    |
|                               | Alanine       | 2.81    | 3.03  | 7.28         | 5.77    |
|                               | Aspartic acid | 4.32    | 4.63  | 10.04        | 8.06    |
|                               | Valine        | 3.49    | 3.72  | 6.83         | 5.18    |
|                               | Methionine    | 0.96    | 1.97  | 0.68         | 0.80    |
|                               | Lysine        | 2.60    | 3.19  | 4.37         | 4.86    |
|                               | Isoleucine    | 2.67    | 2.88  | 5.27         | 4.13    |
|                               | Leucine       | 5.14    | 5.46  | 8.29         | 7.55    |
|                               | Arginine      | 3.63    | 4.02  | 3.60         | 4.51    |
|                               | Proline       | 7.06    | 7.43  | 14.9         | 4.24    |

Table S2: Amino acids analysis of pellet and forage (Period 2).

|                               |               | Pellet  |       | Forage  |
|-------------------------------|---------------|---------|-------|---------|
|                               |               | Control | Trial | Pasture |
| DM%                           |               | 89.0    | 89.3  | 89.3    |
| Crude protein% (DM basis)     |               | 17.4    | 15.4  | 20.9    |
| % (DM basis)                  | Threonine     | 0.43    | 0.38  | 0.87    |
|                               | Serine        | 0.60    | 0.55  | 0.82    |
|                               | Glutamic acid | 3.54    | 3.27  | 2.01    |
|                               | Glycine       | 0.58    | 0.55  | 1.02    |
|                               | Alanine       | 0.48    | 0.47  | 1.22    |
|                               | Aspartic acid | 0.76    | 0.72  | 1.71    |
|                               | Valine        | 0.60    | 0.56  | 1.10    |
|                               | Methionine    | 0.18    | 0.28  | 0.12    |
|                               | Lysine        | 0.43    | 0.48  | 1.05    |
|                               | Isoleucine    | 0.48    | 0.44  | 0.87    |
|                               | Leucine       | 0.90    | 0.83  | 1.60    |
|                               | Tyrosine      | 0.25    | 0.22  | 0.40    |
|                               | Phenylalanine | 0.60    | 0.56  | 1.04    |
|                               | Histidine     | 0.31    | 0.29  | 0.38    |
|                               | Arginine      | 0.64    | 0.59  | 0.94    |
|                               | Proline       | 1.21    | 1.15  | 1.09    |
| % of crude protein (DM basis) | Threonine     | 2.45    | 2.47  | 4.19    |
|                               | Serine        | 3.42    | 3.56  | 3.92    |
|                               | Glutamic acid | 20.34   | 21.23 | 9.63    |
|                               | Glycine       | 3.36    | 3.56  | 4.91    |
|                               | Alanine       | 2.78    | 3.05  | 5.85    |
|                               | Aspartic acid | 4.39    | 4.65  | 8.21    |
|                               | Valine        | 3.42    | 3.64  | 5.26    |
|                               | Methionine    | 1.03    | 1.82  | 0.59    |
|                               | Lysine        | 2.45    | 3.13  | 5.04    |
|                               | Isoleucine    | 2.78    | 2.84  | 4.16    |
|                               | Leucine       | 5.17    | 5.38  | 7.67    |
|                               | Arginine      | 3.68    | 3.85  | 4.48    |
|                               | Proline       | 6.97    | 7.49  | 5.24    |
